# Supplementary material for: Overall Survival and Exploratory Biomarker Analyses of Abemaciclib plus Trastuzumab with or without Fulvestrant versus Trastuzumab plus Chemotherapy in HR+, HER2+ Metastatic Breast Cancer Patients
Source: PubMed Central journal article supplement — Clin Cancer Res. 2023 Oct 31;30(1):39–49. doi: 10.1158/1078-0432.CCR-23-1209 (PMC10767303; doi:10.1158/1078-0432.ccr-23-1209), 2023-10-31
Supplement: ccr-23-1209_supplementary_figure_s1_suppfs1.pdf [file ccr-23-1209_supplementary_figure_s1_suppfs1.pdf]

Supplementary Figure S1: REMARK (Reporting Recommendations for Tumor Marker Prognostic Studies) diagram for patients in the monarchHER trial.

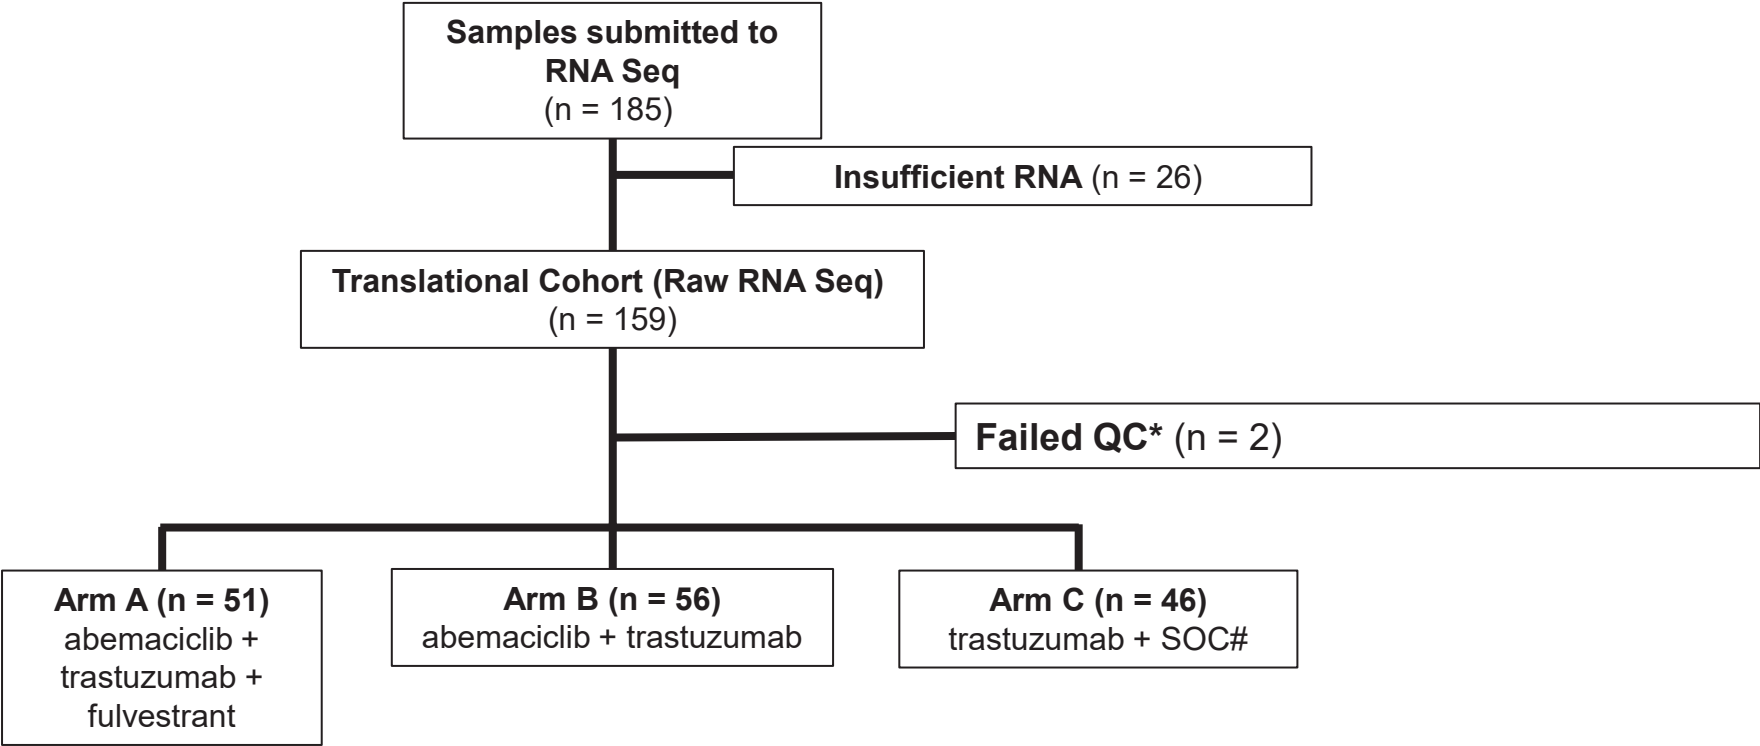

\* Two patients have been considered as outliers based on PCA and have been excluded.

# Standard of care (SOC) single agent chemotherapy of physician's choice administered according to product label.
