# Supplementary material for: Overall Survival and Exploratory Biomarker Analyses of Abemaciclib plus Trastuzumab with or without Fulvestrant versus Trastuzumab plus Chemotherapy in HR+, HER2+ Metastatic Breast Cancer Patients
Source: PubMed Central journal article supplement — Clin Cancer Res. 2023 Oct 31;30(1):39–49. doi: 10.1158/1078-0432.CCR-23-1209 (PMC10767303; doi:10.1158/1078-0432.ccr-23-1209), 2023-10-31

**Supplementary Figure S2: Progression-free survival (PFS) and overall survival (OS) for intrinsic subtypes.** Panels A and B show progression-free survival (A) and overall survival (B) in Arms A and B combined; Panels C and D show progression-free survival (C) and overall survival (D) in Arms A, B and C combined.

**A**

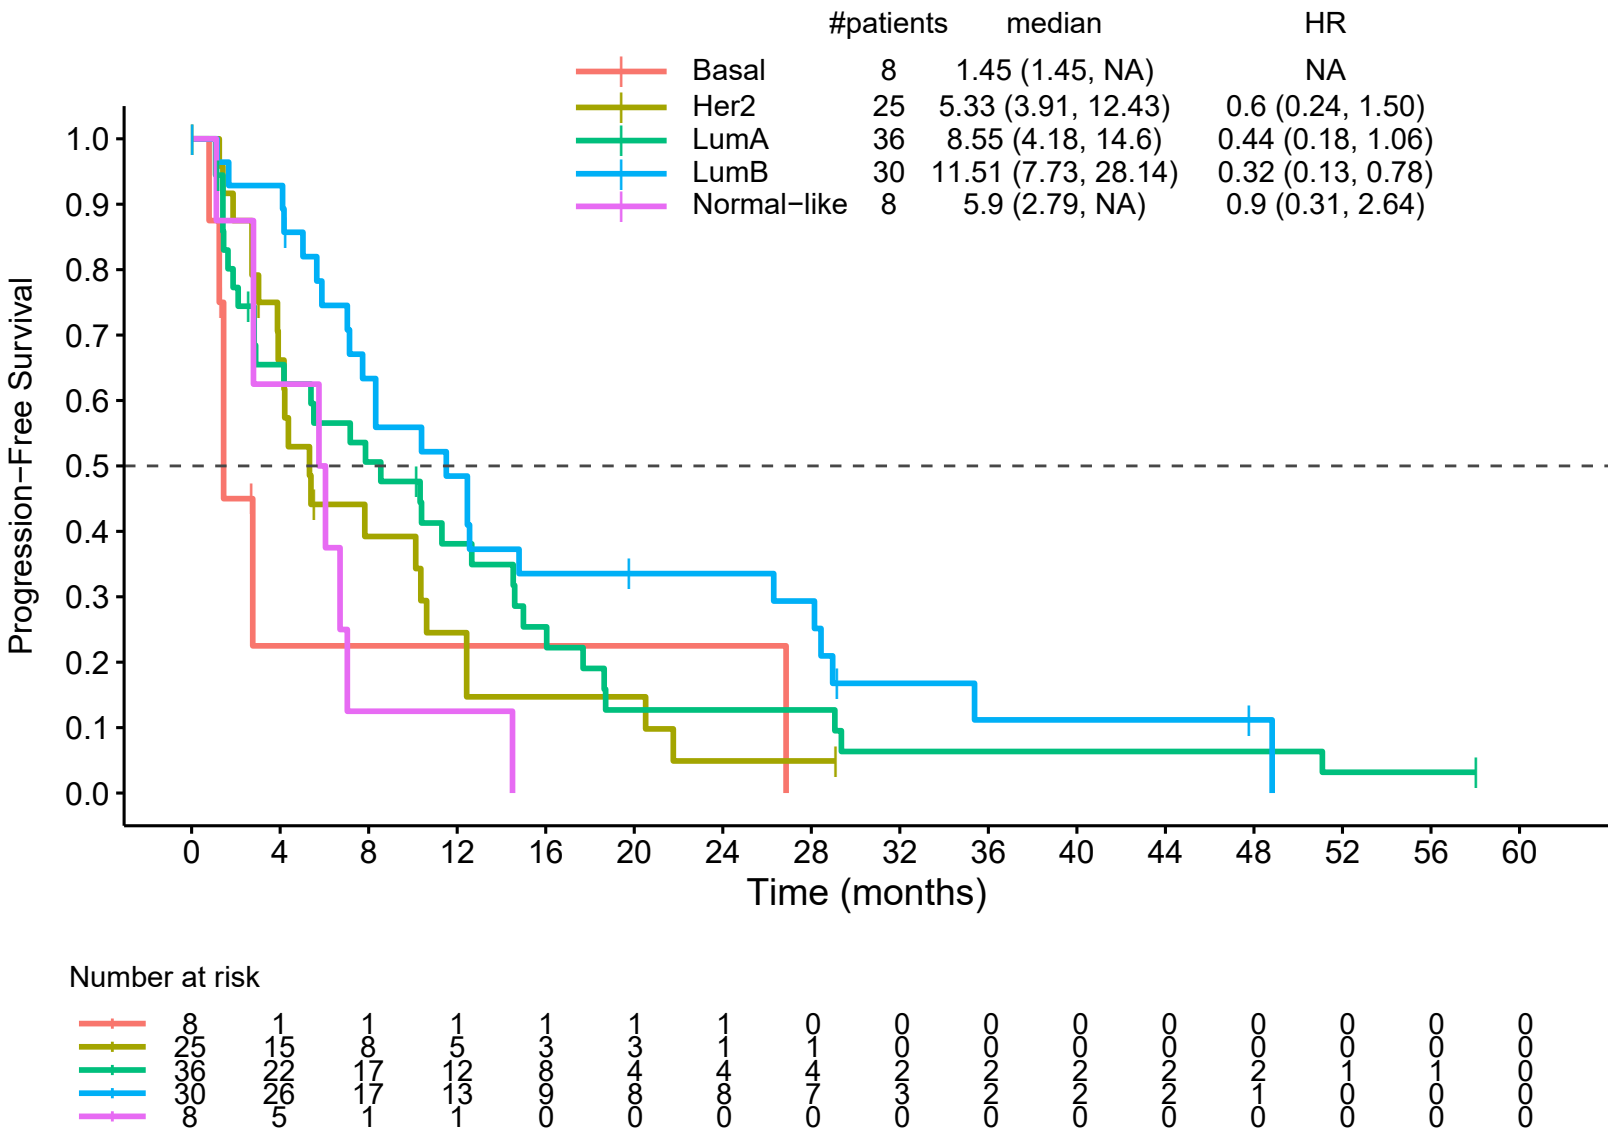

**B**

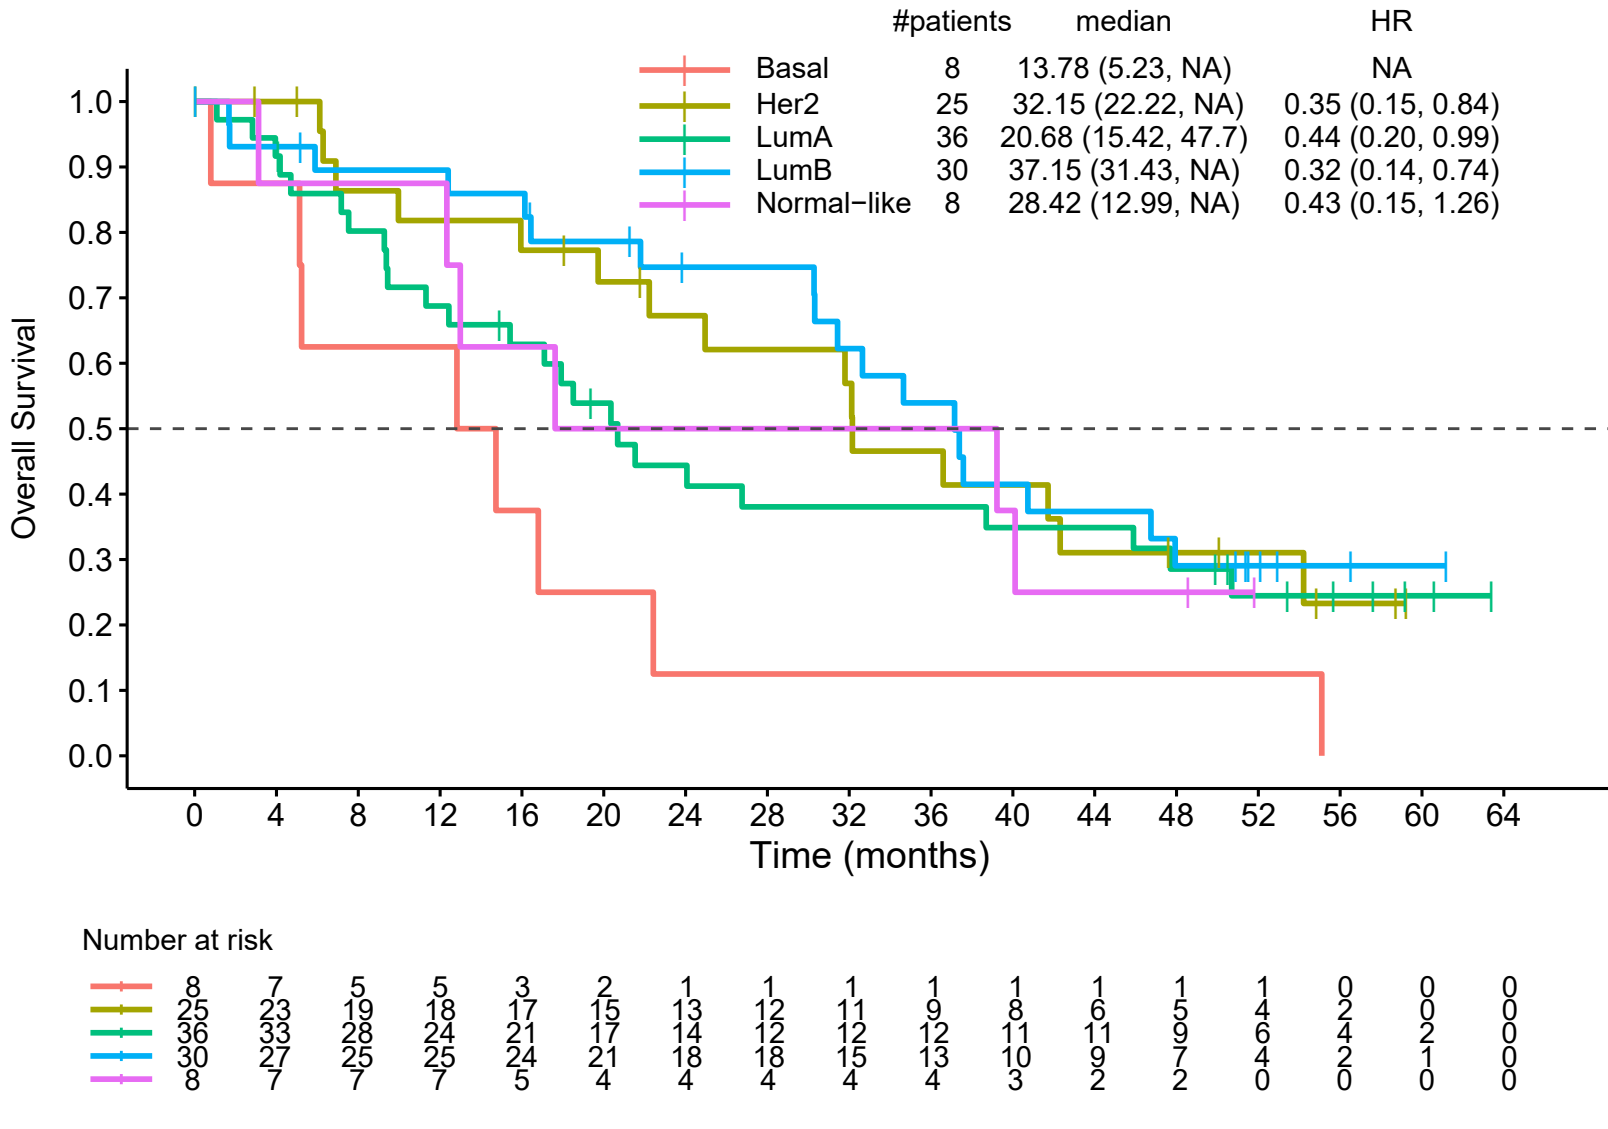

**C**

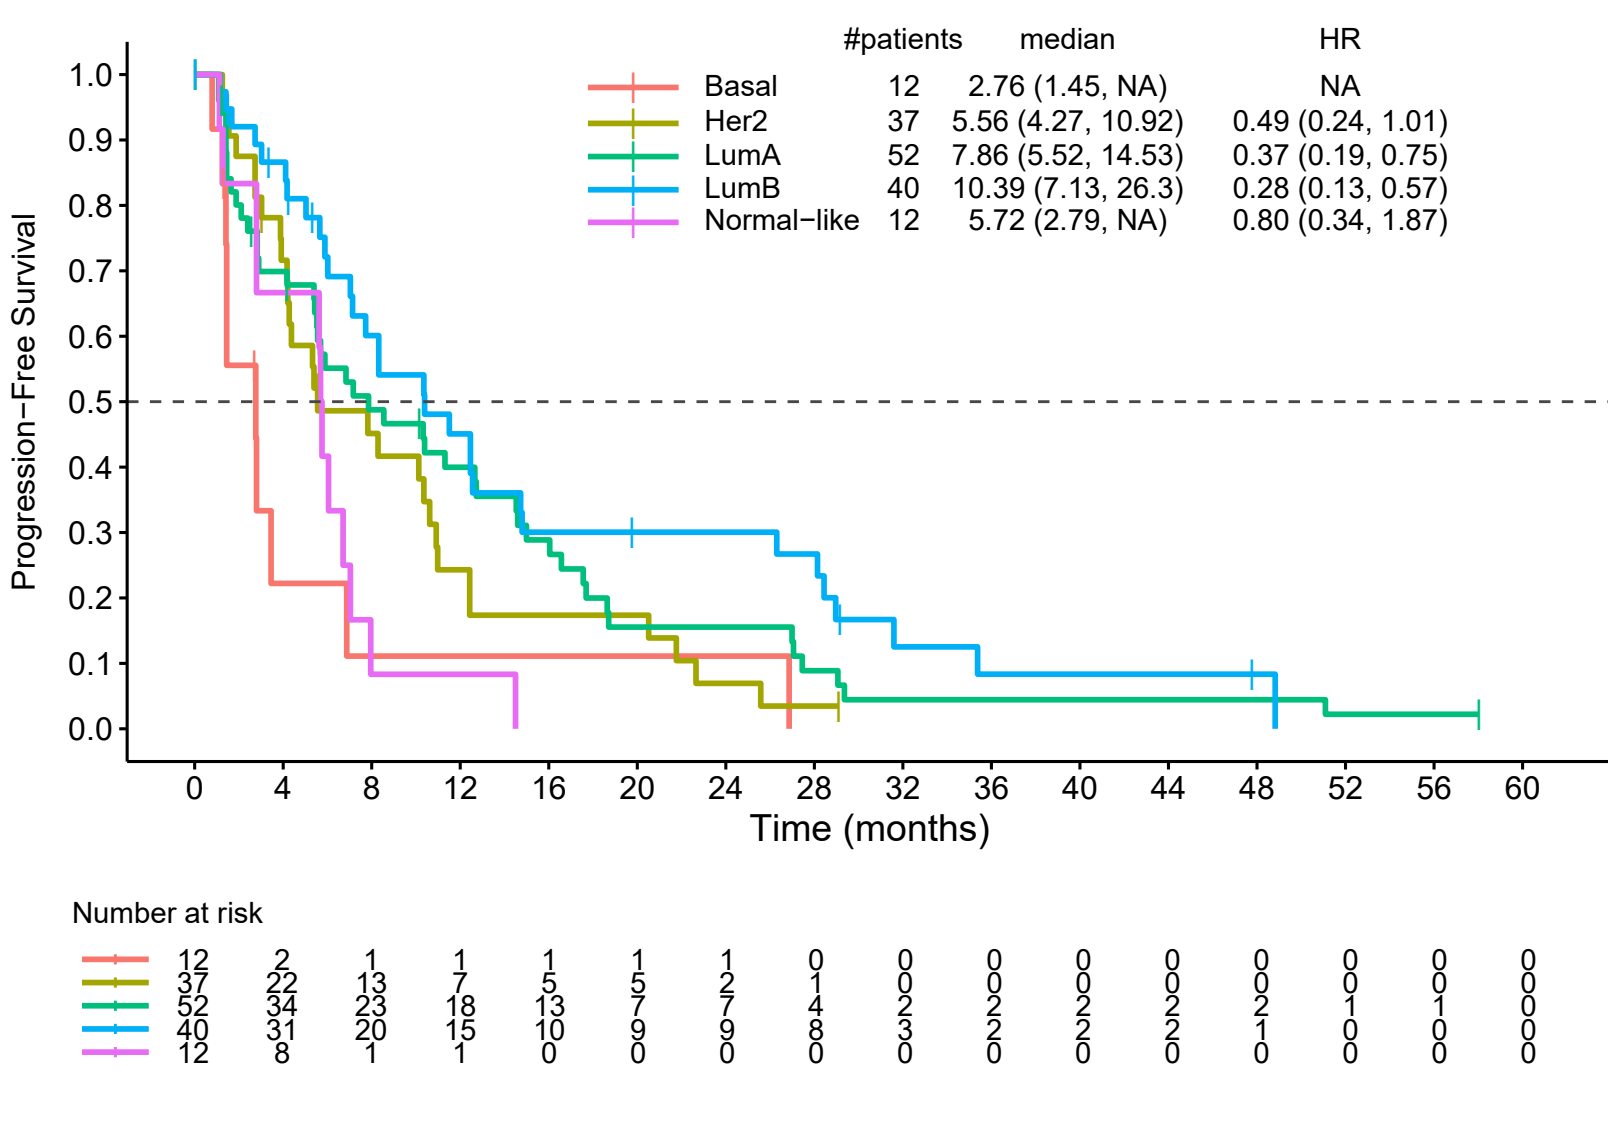

**D**

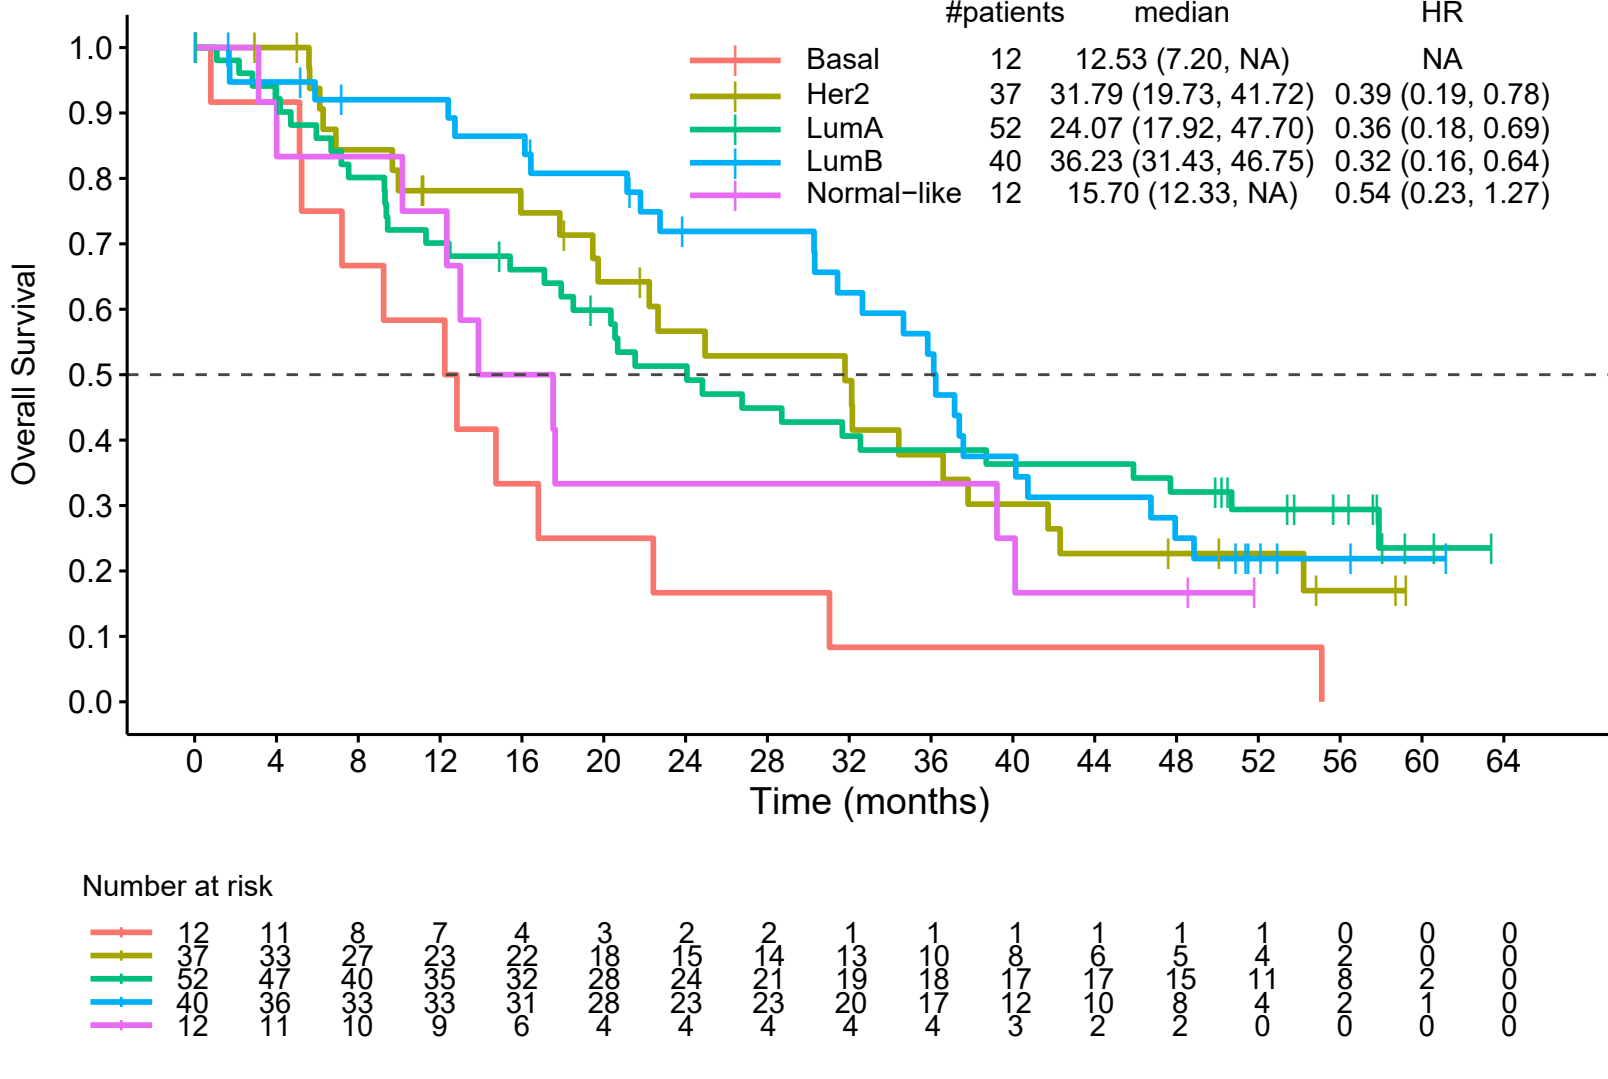

Supplement: ccr-23-1209_supplementary_figure_s2_suppfs2.pdf [file ccr-23-1209_supplementary_figure_s2_suppfs2.pdf]
