# Supplementary material for: Overall Survival and Exploratory Biomarker Analyses of Abemaciclib plus Trastuzumab with or without Fulvestrant versus Trastuzumab plus Chemotherapy in HR+, HER2+ Metastatic Breast Cancer Patients
Source: PubMed Central journal article supplement — Clin Cancer Res. 2023 Oct 31;30(1):39–49. doi: 10.1158/1078-0432.CCR-23-1209 (PMC10767303; doi:10.1158/1078-0432.ccr-23-1209), 2023-10-31
Supplement: ccr-23-1209_supplementary_figure_s4_suppfs4.pdf [file ccr-23-1209_supplementary_figure_s4_suppfs4.pdf]

**Supplementary Figure S4: Progression-free survival and overall survival for Arm C after differential gene expression analysis of tumor samples.** Panels A and B show progression-free survival (A) and overall survival (B) in G1 and G2 groups in Arm C. Abbreviations: HR: hazard ratio.

**A**

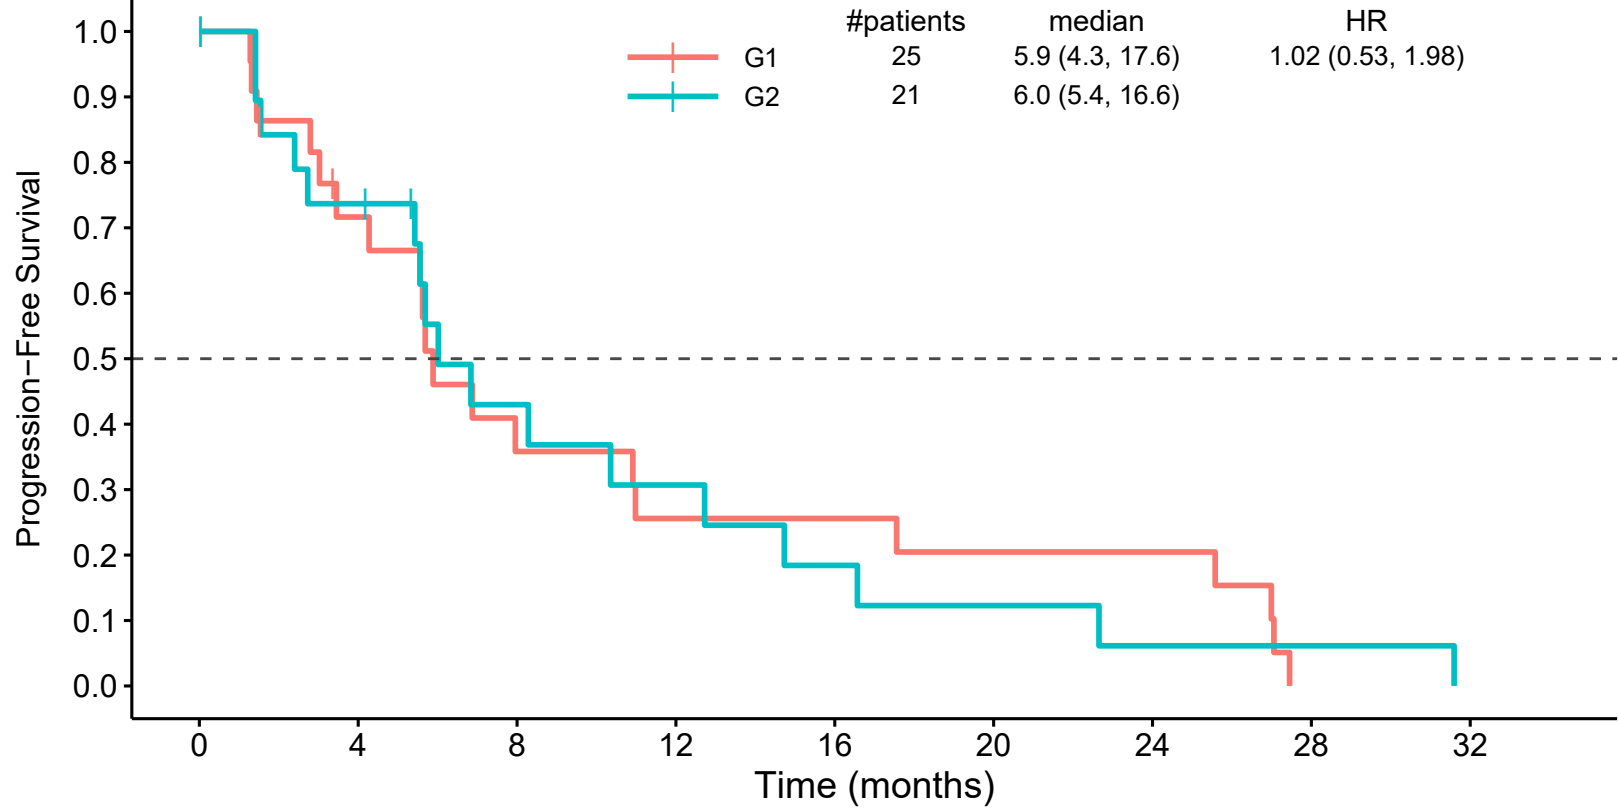

Number at risk

|     |    |    |   |   |   |   |   |   |   |
|-----|----|----|---|---|---|---|---|---|---|
| —+— | 25 | 14 | 7 | 5 | 5 | 4 | 4 | 0 | 0 |
| —+— | 21 | 14 | 7 | 5 | 3 | 2 | 1 | 1 | 0 |

**B**

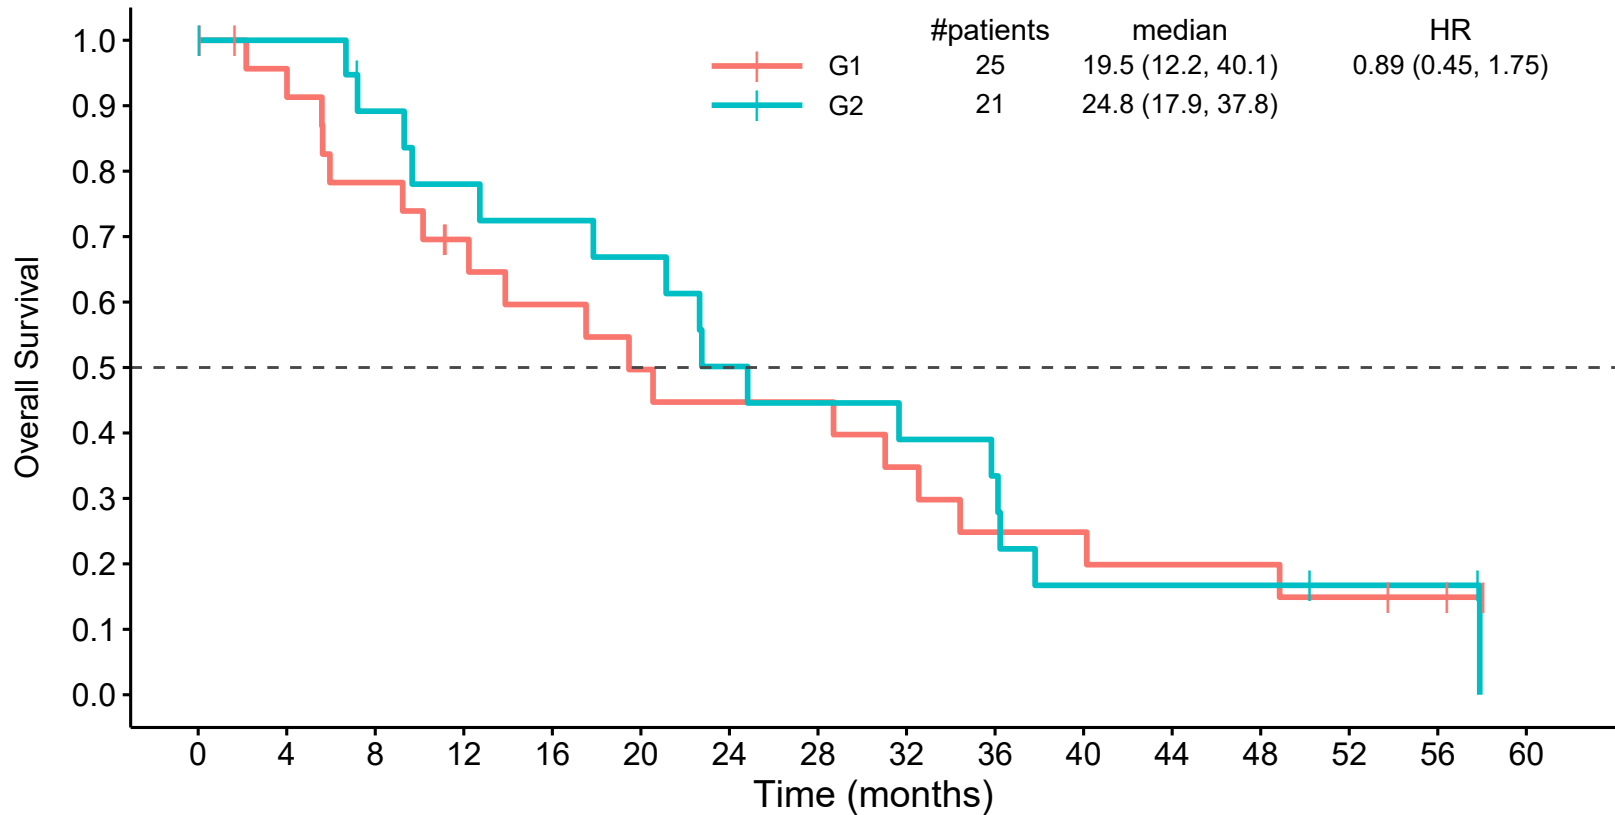

Number at risk

|     |    |    |    |    |    |    |   |   |   |   |   |   |   |   |   |   |
|-----|----|----|----|----|----|----|---|---|---|---|---|---|---|---|---|---|
| —+— | 25 | 22 | 18 | 14 | 12 | 10 | 9 | 9 | 7 | 5 | 5 | 4 | 4 | 3 | 2 | 0 |
| —+— | 21 | 19 | 16 | 14 | 13 | 12 | 9 | 8 | 7 | 6 | 3 | 3 | 3 | 2 | 2 | 0 |
