# Supplementary material for: Overall Survival and Exploratory Biomarker Analyses of Abemaciclib plus Trastuzumab with or without Fulvestrant versus Trastuzumab plus Chemotherapy in HR+, HER2+ Metastatic Breast Cancer Patients
Source: PubMed Central journal article supplement — Clin Cancer Res. 2023 Oct 31;30(1):39–49. doi: 10.1158/1078-0432.CCR-23-1209 (PMC10767303; doi:10.1158/1078-0432.ccr-23-1209), 2023-10-31
Supplement: ccr-23-1209_supplementary_table_s1_suppts1.pdf [file ccr-23-1209_supplementary_table_s1_suppts1.pdf]

**Supplementary Table S1. Updated objective response rate for the ITT population.**

|                              | Abemaciclib + Trastuzumab + Fulvestrant (Arm A) (N=79) |                       | Abemaciclib + Trastuzumab (Arm B) (N=79) |                       | Trastuzumab + Chemotherapy (Arm C) (N=79) |                       | Stratified Odds Ratio (95% CI) <sup>b</sup> |                  | Stratified p-value <sup>c</sup> |                |
|------------------------------|--------------------------------------------------------|-----------------------|------------------------------------------|-----------------------|-------------------------------------------|-----------------------|---------------------------------------------|------------------|---------------------------------|----------------|
|                              | n (%)                                                  | (95% CI) <sup>a</sup> | n (%)                                    | (95% CI) <sup>a</sup> | n (%)                                     | (95% CI) <sup>a</sup> | Arm A/ Arm C                                | Arm B/ Arm C     | Arm A vs Arm C                  | Arm B vs Arm C |
| <b>Best Overall Response</b> |                                                        |                       |                                          |                       |                                           |                       |                                             |                  |                                 |                |
| CR                           | 1<br>(1.3)                                             | (0.0-3.7)             | 0<br>(0.0)                               | N/A                   | 1<br>(1.3)                                | (0.0-3.7)             |                                             |                  |                                 |                |
| PR                           | 27<br>(34.2)                                           | (23.7-44.6)           | 11<br>(13.9)                             | (6.3-21.6)            | 10<br>(12.7)                              | (5.3-20.0)            |                                             |                  |                                 |                |
| SD                           | 34<br>(43.0)                                           | (32.1-54.0)           | 48<br>(60.8)                             | (50.0-71.5)           | 42<br>(53.2)                              | (42.2-64.2)           |                                             |                  |                                 |                |
| SD persistent for ≥6 month   | 18<br>(22.8)                                           | (13.5-32.0)           | 25<br>(31.6)                             | (21.4-41.9)           | 19<br>(24.1)                              | (14.6-33.5)           |                                             |                  |                                 |                |
| PD                           | 10<br>(12.7)                                           | (5.3-20.0)            | 13<br>(16.5)                             | (8.3-24.6)            | 14<br>(17.7)                              | (9.3-26.1)            |                                             |                  |                                 |                |
| Objective PD                 | 10<br>(12.7)                                           | (5.3-20.0)            | 13<br>(16.5)                             | (8.3-24.6)            | 14<br>(17.7)                              | (9.3-26.1)            |                                             |                  |                                 |                |
| NE                           | 7<br>(8.9)                                             | (2.6-15.1)            | 7<br>(8.9)                               | (2.6-15.1)            | 12<br>(15.2)                              | (7.3-23.1)            |                                             |                  |                                 |                |
| ORR                          | 28<br>(35.4)                                           | (24.9-46.0)           | 11<br>(13.9)                             | (6.3-21.6)            | 11<br>(13.9)                              | (6.3-21.6)            | 3.5<br>(1.6-7.8)                            | 0.9<br>(0.4-2.4) | 0.001                           | 1.000          |
| DCR                          | 62<br>(78.5)                                           | (69.4-87.5)           | 59<br>(74.7)                             | (65.1-84.3)           | 53<br>(67.1)                              | (56.7-77.5)           | 2.1<br>(1.0-4.3)                            | 1.4<br>(0.7-2.8) | 0.065                           | 0.376          |
| CBR                          | 46<br>(58.2)                                           | (47.4-69.1)           | 36<br>(45.6)                             | (34.6-56.6)           | 30<br>(38.0)                              | (27.3-48.7)           | 2.7<br>(1.4-5.3)                            | 1.3<br>(0.7-2.5) | 0.003                           | 0.413          |

Abbreviations: Arm A = abemaciclib 150mg + trastuzumab 8mg/kg + fulvestrant 500mg; Arm B = abemaciclib 150mg + trastuzumab 8mg/kg; Arm C = trastuzumab 8mg/kg + chemotherapy. CBR: clinical benefit rate (CR/PR/SD persistent for ≥6 month); CR: complete response; CI: confidence interval; DCR: disease control rate (CR/PR/SD); N: number of subjects in population; n: number of subjects; NE: non evaluable; ORR: overall response rate (CR/PR); PD: progressive disease; PR: partial response; SD: stable disease. Response criteria used was RECIST 1.1.

<sup>a</sup> CIs are based on the normal approximation.

<sup>b</sup> Stratified by number of previous systemic regimens, measurable disease at baseline

<sup>c</sup> p-value is calculated by Exact Cochran-Mantel-Haenszel test stratified by the randomization strata number of previous systemic regimens, measurable disease at baseline.
