# Supplementary material for: Overall Survival and Exploratory Biomarker Analyses of Abemaciclib plus Trastuzumab with or without Fulvestrant versus Trastuzumab plus Chemotherapy in HR+, HER2+ Metastatic Breast Cancer Patients
Source: PubMed Central journal article supplement — Clin Cancer Res. 2023 Oct 31;30(1):39–49. doi: 10.1158/1078-0432.CCR-23-1209 (PMC10767303; doi:10.1158/1078-0432.ccr-23-1209), 2023-10-31
Supplement: ccr-23-1209_supplementary_table_s2_suppts2.pdf [file ccr-23-1209_supplementary_table_s2_suppts2.pdf]

**Supplementary Table S2. Updated adverse event overview.**

|                                                                                                                   | Abemaciclib +<br>Trastuzumab +<br>Fulvestrant<br>(Arm A) (N=78) |      | Abemaciclib +<br>Trastuzumab<br>(Arm B)<br>(N=77) |      | Trastuzumab +<br>Chemotherapy<br>(Arm C)<br>(N=72) |      | Total<br>(N=227) |      |
|-------------------------------------------------------------------------------------------------------------------|-----------------------------------------------------------------|------|---------------------------------------------------|------|----------------------------------------------------|------|------------------|------|
|                                                                                                                   | n                                                               | %    | n                                                 | %    | n                                                  | %    | n                | %    |
| <b>Number of Subjects<sup>a</sup></b>                                                                             |                                                                 |      |                                                   |      |                                                    |      |                  |      |
| <b>Subjects with ≥1 TEAE</b>                                                                                      | 77                                                              | 98.7 | 76                                                | 98.7 | 68                                                 | 94.4 | 221              | 97.4 |
| Related to study treatment <sup>b</sup>                                                                           | 73                                                              | 93.6 | 69                                                | 89.6 | 60                                                 | 83.3 | 202              | 89.0 |
| <b>Subjects with ≥1 CTCAE<br/>Grade ≥3 TEAE</b>                                                                   | 59                                                              | 75.6 | 43                                                | 55.8 | 39                                                 | 54.2 | 141              | 62.1 |
| Related to study treatment <sup>b</sup>                                                                           | 45                                                              | 57.7 | 31                                                | 40.3 | 25                                                 | 34.7 | 101              | 44.5 |
| <b>Subjects with ≥1 SAE</b>                                                                                       | 24                                                              | 30.8 | 15                                                | 19.5 | 14                                                 | 19.4 | 53               | 23.3 |
| Related to study treatment <sup>b</sup>                                                                           | 8                                                               | 10.3 | 4                                                 | 5.2  | 5                                                  | 6.9  | 17               | 7.5  |
| <b>Subjects who discontinued<br/>study treatment due to AE</b>                                                    | 11                                                              | 14.1 | 13                                                | 16.9 | 7                                                  | 9.7  | 31               | 13.7 |
| Related to study treatment <sup>b</sup>                                                                           | 6                                                               | 7.7  | 10                                                | 13.0 | 5                                                  | 6.9  | 21               | 9.3  |
| <b>Subjects who discontinued<br/>study treatment due to SAE</b>                                                   | 4                                                               | 5.1  | 2                                                 | 2.6  | 3                                                  | 4.2  | 9                | 4.0  |
| Related to study treatment <sup>b</sup>                                                                           | 1                                                               | 1.3  | 2                                                 | 2.6  | 2                                                  | 2.8  | 5                | 2.2  |
| <b>Subjects who died due to AE<br/>on study treatment<sup>c</sup></b>                                             | 3                                                               | 3.8  | 1                                                 | 1.3  | 1                                                  | 1.4  | 5                | 2.2  |
| Related to study treatment <sup>b</sup>                                                                           | 0                                                               | 0.0  | 1                                                 | 1.3  | 1                                                  | 1.4  | 2                | 0.9  |
| <b>Subjects who died due to AE<br/>within 30 days of<br/>discontinuation from study<br/>treatment<sup>c</sup></b> | 1                                                               | 1.3  | 0                                                 | 0    | 0                                                  | 0.0  | 1                | 0.4  |
| Related to study treatment <sup>b</sup>                                                                           | 0                                                               | 0.0  | 0                                                 | 0    | 0                                                  | 0.0  | 0                | 0.0  |

Abbreviations: N = number of subjects in safety population; n = number of subjects in the specified category; CTCAE = Common Terminology Criteria for Adverse Events; TEAE = treatment-emergent adverse event; MedDRA = Medical Dictionary for Regulatory Activities; AE = adverse event; SAE = serious adverse event.

<sup>a</sup> Subjects may be counted in more than 1 category.

<sup>b</sup> Includes events that were considered related to study treatment as judged by the investigator.

<sup>c</sup> Deaths are also included as SAEs and discontinuations due to AEs.

MedDRA Version 24.1; CTCAE Version 4.
