# Supplementary material for: Overall Survival and Exploratory Biomarker Analyses of Abemaciclib plus Trastuzumab with or without Fulvestrant versus Trastuzumab plus Chemotherapy in HR+, HER2+ Metastatic Breast Cancer Patients
Source: PubMed Central journal article supplement — Clin Cancer Res. 2023 Oct 31;30(1):39–49. doi: 10.1158/1078-0432.CCR-23-1209 (PMC10767303; doi:10.1158/1078-0432.ccr-23-1209), 2023-10-31
Supplement: ccr-23-1209_supplementary_table_s3_suppts3.pdf [file ccr-23-1209_supplementary_table_s3_suppts3.pdf]

**Supplementary Table S3: Summary of abemaciclib dose adjustments in the safety population of the monarchHER trial.**

|                                                          | <b>Abemaciclib +<br/>Trastuzumab +<br/>Fulvestrant<br/>(Arm A) (N=78)</b> | <b>Abemaciclib +<br/>Trastuzumab<br/>(Arm B)<br/>(N=77)</b> |
|----------------------------------------------------------|---------------------------------------------------------------------------|-------------------------------------------------------------|
|                                                          | <b>n (%)</b>                                                              |                                                             |
| <b>Number of patients with dose reduction</b>            | 39 (50.0)                                                                 | 32 (41.6)                                                   |
| <b>Patients with 1 dose reduction</b>                    | 28 (35.9)                                                                 | 19 (24.7)                                                   |
| <b>Patients with 2 dose reductions</b>                   | 11 (14.1)                                                                 | 13 (16.9)                                                   |
| <b>Patients with <math>\geq</math> 3 dose reductions</b> | 0 (0.0)                                                                   | 0 (0.0)                                                     |
