# Supplementary material for: Overall Survival and Exploratory Biomarker Analyses of Abemaciclib plus Trastuzumab with or without Fulvestrant versus Trastuzumab plus Chemotherapy in HR+, HER2+ Metastatic Breast Cancer Patients
Source: PubMed Central journal article supplement — Clin Cancer Res. 2023 Oct 31;30(1):39–49. doi: 10.1158/1078-0432.CCR-23-1209 (PMC10767303; doi:10.1158/1078-0432.ccr-23-1209), 2023-10-31
Supplement: ccr-23-1209_supplementary_table_s4_suppts4.pdf [file ccr-23-1209_supplementary_table_s4_suppts4.pdf]

**Supplementary Table S4: ORA for 216 differentially expressed genes.** Abbreviations: DN:

downregulation of 112 genes in progressive tumors; FDR: false discovery rate; IL2: interleukin 2, IL6:

interleukin 6; JAK: Janus kinase; mTORC1: mammalian/mechanistic target of rapamycin complex1;

KRAS: Kirsten rat sarcoma virus; ORA; over representation analysis; PI3K: phosphoinositide 3-kinase;

TGF: transforming growth factor; TNFA: tumor necrosis factor alpha; UV: ultraviolet; UP: upregulation

of 104 genes in responsive tumors; WNT: Wingless Int-1

| UP/DN | Hallmark                | Hypergeometric<br>p-value | Hypergeometric<br>FDR | Matched Symbol            |
|-------|-------------------------|---------------------------|-----------------------|---------------------------|
| UP    | ANDROGEN RESPONSE       | 0.002                     | 0.096                 | GUCY1A1, KRT19,<br>INSIG1 |
| UP    | APICAL JUNCTION         | 0.021                     | 0.237                 | TMEM8B, WNK4,<br>INSIG1   |
| UP    | ESTROGEN RESPONSE EARLY | 0.022                     | 0.237                 | RETREG1, TOB1,<br>KRT19   |
| UP    | ESTROGEN RESPONSE LATE  | 0.022                     | 0.237                 | TOB1, TSPAN13,<br>KRT19   |
| UP    | APICAL SURFACE          | 0.024                     | 0.237                 | TMEM8B                    |
| UP    | UV RESPONSE DN          | 0.043                     | 0.335                 | DBP, INSIG1               |
| UP    | XENOBIOTIC METABOLISM   | 0.093                     | 0.335                 | XDH, ESR1                 |
| UP    | MYOGENESIS              | 0.094                     | 0.335                 | CACNA1H, HRC              |
| UP    | GLYCOLYSIS              | 0.094                     | 0.335                 | GNE, CACNA1H              |
| UP    | E2F TARGETS             | 0.094                     | 0.335                 | UBR7, DONSON              |
| UP    | P53 PATHWAY             | 0.094                     | 0.335                 | TOB1, WWP1                |
| UP    | KRAS SIGNALING UP       | 0.094                     | 0.335                 | TSPAN13, GUCY1A1          |
| UP    | KRAS SIGNALING DN       | 0.094                     | 0.335                 | COL2A1, PDK2              |
| UP    | MTORC1 SIGNALING        | 0.094                     | 0.335                 | ACACA, INSIG1             |

|    |                                    |       |       |         |
|----|------------------------------------|-------|-------|---------|
| UP | PI3K AKT MTOR SIGNALING            | 0.112 | 0.372 | ACACA   |
| UP | UNFOLDED PROTEIN<br>RESPONSE       | 0.126 | 0.394 | LSM1    |
| UP | NOTCH SIGNALING                    | 0.162 | 0.450 |         |
| UP | SPERMATOGENESIS                    | 0.168 | 0.450 | GSG1    |
| UP | ANGIOGENESIS                       | 0.180 | 0.450 |         |
| UP | HEDGEHOG SIGNALING                 | 0.180 | 0.450 |         |
| UP | PANCREAS BETA CELLS                | 0.198 | 0.465 |         |
| UP | WNT BETA CATENIN<br>SIGNALING      | 0.207 | 0.465 |         |
| UP | UV RESPONSE UP                     | 0.214 | 0.465 | COL2A1  |
| UP | REACTIVE OXYGEN SPECIES<br>PATHWAY | 0.237 | 0.494 |         |
| UP | TGF BETA SIGNALING                 | 0.258 | 0.516 |         |
| UP | MYC TARGETS V2                     | 0.274 | 0.518 |         |
| UP | ADIPOGENESIS                       | 0.300 | 0.518 | TOB1    |
| UP | OXIDATIVE<br>PHOSPHORYLATION       | 0.300 | 0.518 | MRPS30  |
| UP | G2M CHECKPOINT                     | 0.300 | 0.518 | SLC38A1 |
| UP | CHOLESTEROL<br>HOMEOSTASIS         | 0.336 | 0.561 |         |
| UP | IL6 JAK STAT3 SIGNALING            | 0.383 | 0.618 |         |
| UP | PROTEIN SECRETION                  | 0.413 | 0.631 |         |
| UP | INTERFERON ALPHA<br>RESPONSE       | 0.417 | 0.631 |         |
| UP | PEROXISOME                         | 0.439 | 0.646 |         |
| UP | BILE ACID METABOLISM               | 0.464 | 0.663 |         |

|    |                                      |       |       |                                   |
|----|--------------------------------------|-------|-------|-----------------------------------|
| UP | COAGULATION                          | 0.537 | 0.675 |                                   |
| UP | DNA REPAIR                           | 0.568 | 0.675 |                                   |
| UP | FATTY ACID METABOLISM                | 0.585 | 0.675 |                                   |
| UP | APOPTOSIS                            | 0.594 | 0.675 |                                   |
| UP | MITOTIC SPINDLE                      | 0.673 | 0.675 |                                   |
| UP | IL2 STAT5 SIGNALING                  | 0.673 | 0.675 |                                   |
| UP | EPITHELIAL MESENCHYMAL<br>TRANSITION | 0.675 | 0.675 |                                   |
| UP | ALLOGRAFT REJECTION                  | 0.675 | 0.675 |                                   |
| UP | COMPLEMENT                           | 0.675 | 0.675 |                                   |
| UP | INTERFERON GAMMA<br>RESPONSE         | 0.675 | 0.675 |                                   |
| UP | INFLAMMATORY RESPONSE                | 0.675 | 0.675 |                                   |
| UP | HEME METABOLISM                      | 0.675 | 0.675 |                                   |
| UP | HYPOXIA                              | 0.675 | 0.675 |                                   |
| UP | MYC TARGETS V1                       | 0.675 | 0.675 |                                   |
| UP | TNFA SIGNALING VIA NFKB              | 0.675 | 0.675 |                                   |
| DN | MTORC1 SIGNALING                     | 0.004 | 0.194 | ME1, PIK3R3, PHGDH,<br>GLA, NFIL3 |
| DN | XENOBIOTIC METABOLISM                | 0.017 | 0.210 | AQP9, CROT,<br>SLC6A12, TGFB2     |
| DN | ESTROGEN RESPONSE LATE               | 0.018 | 0.210 | GJB3, PPIF, TRIM29,<br>GLA        |
| DN | UV RESPONSE DN                       | 0.024 | 0.210 | CACNA1A, PIK3R3,<br>KIT           |
| DN | NOTCH SIGNALING                      | 0.025 | 0.210 | FZD7                              |
| DN | UV RESPONSE UP                       | 0.033 | 0.210 | PPIF, ICAM1, SLC6A12              |

|    |                              |       |       |                         |
|----|------------------------------|-------|-------|-------------------------|
| DN | APICAL SURFACE               | 0.045 | 0.210 | SCUBE1                  |
| DN | PI3K AKT MTOR SIGNALING      | 0.047 | 0.210 | PIK3R3, ADCY2           |
| DN | BILE ACID METABOLISM         | 0.055 | 0.210 | AQP9, CROT              |
| DN | APICAL JUNCTION              | 0.066 | 0.210 | PIK3R3, ICAM1, CDH3     |
| DN | ALLOGRAFT REJECTION          | 0.067 | 0.210 | ICAM1, TGFB2,<br>CDKN2A |
| DN | COMPLEMENT                   | 0.067 | 0.210 | ME1, MMP12, CASP1       |
| DN | INFLAMMATORY RESPONSE        | 0.067 | 0.210 | AQP9, P2RX7, ICAM1      |
| DN | HYPOXIA                      | 0.067 | 0.210 | PLIN2, EFNA3, NFIL3     |
| DN | ESTROGEN RESPONSE EARLY      | 0.067 | 0.210 | ZNF185, PPIF, GLA       |
| DN | KRAS SIGNALING DN            | 0.067 | 0.210 | TGFB2, TENM2,<br>TCF7L1 |
| DN | CHOLESTEROL<br>HOMEOSTASIS   | 0.112 | 0.329 | NFIL3                   |
| DN | APOPTOSIS                    | 0.128 | 0.354 | TGFB2, CASP1            |
| DN | PROTEIN SECRETION            | 0.170 | 0.359 | GLA                     |
| DN | INTERFERON ALPHA<br>RESPONSE | 0.173 | 0.359 | CASP1                   |
| DN | PEROXISOME                   | 0.193 | 0.359 | ALB                     |
| DN | IL2 STAT5 SIGNALING          | 0.199 | 0.359 | PLIN2, NFIL3            |
| DN | ADIPOGENESIS                 | 0.201 | 0.359 | ME1, PLIN2              |
| DN | INTERFERON GAMMA<br>RESPONSE | 0.201 | 0.359 | ICAM1, CASP1            |
| DN | GLYCOLYSIS                   | 0.201 | 0.359 | ME1, EFNA3              |
| DN | P53 PATHWAY                  | 0.201 | 0.359 | CDKN2A, CASP1           |
| DN | KRAS SIGNALING UP            | 0.201 | 0.359 | CROT, SCG5              |
| DN | TNFA SIGNALING VIA NFKB      | 0.201 | 0.359 | ICAM1, NFIL3            |

|    |                                      |       |       |          |
|----|--------------------------------------|-------|-------|----------|
| DN | ANGIOGENESIS                         | 0.245 | 0.409 |          |
| DN | HEDGEHOG SIGNALING                   | 0.245 | 0.409 |          |
| DN | PANCREAS BETA CELLS                  | 0.269 | 0.427 |          |
| DN | WNT BETA CATENIN<br>SIGNALING        | 0.280 | 0.427 |          |
| DN | SPERMATOGENESIS                      | 0.282 | 0.427 | SCG5     |
| DN | REACTIVE OXYGEN SPECIES<br>PATHWAY   | 0.319 | 0.469 |          |
| DN | TGF BETA SIGNALING                   | 0.345 | 0.480 |          |
| DN | FATTY ACID METABOLISM                | 0.346 | 0.480 | ME1      |
| DN | MYC TARGETS V2                       | 0.366 | 0.494 |          |
| DN | EPITHELIAL MESENCHYMAL<br>TRANSITION | 0.465 | 0.553 | COL7A1   |
| DN | MYOGENESIS                           | 0.465 | 0.553 | TNNI2    |
| DN | HEME METABOLISM                      | 0.465 | 0.553 | SLC25A37 |
| DN | E2F TARGETS                          | 0.465 | 0.553 | CDKN2A   |
| DN | G2M CHECKPOINT                       | 0.465 | 0.553 | MEIS2    |
| DN | IL6 JAK STAT3 SIGNALING              | 0.496 | 0.576 |          |
| DN | ANDROGEN RESPONSE                    | 0.545 | 0.620 |          |
| DN | UNFOLDED PROTEIN<br>RESPONSE         | 0.590 | 0.656 |          |
| DN | COAGULATION                          | 0.665 | 0.722 |          |
| DN | DNA REPAIR                           | 0.696 | 0.740 |          |
| DN | MITOTIC SPINDLE                      | 0.795 | 0.797 |          |
| DN | OXIDATIVE<br>PHOSPHORYLATION         | 0.797 | 0.797 |          |
| DN | MYC TARGETS V1                       | 0.797 | 0.797 |          |
