# Supplementary material for: Overall Survival and Exploratory Biomarker Analyses of Abemaciclib plus Trastuzumab with or without Fulvestrant versus Trastuzumab plus Chemotherapy in HR+, HER2+ Metastatic Breast Cancer Patients
Source: PubMed Central journal article supplement — Clin Cancer Res. 2023 Oct 31;30(1):39–49. doi: 10.1158/1078-0432.CCR-23-1209 (PMC10767303; doi:10.1158/1078-0432.ccr-23-1209), 2023-10-31
Supplement: ccr-23-1209_supplementary_table_s5_suppts5.pdf [file ccr-23-1209_supplementary_table_s5_suppts5.pdf]

**Supplementary Table S5. Representativeness of Study Participants.**

|                                                     |                                                                                                                                                                                                                                                                         |
|-----------------------------------------------------|-------------------------------------------------------------------------------------------------------------------------------------------------------------------------------------------------------------------------------------------------------------------------|
| <b>Cancer type(s)/subtype(s)/stage(s)/condition</b> | HR+, HER2+ advanced breast cancer                                                                                                                                                                                                                                       |
| Considerations related to:                          |                                                                                                                                                                                                                                                                         |
| Sex                                                 | HR+, HER2+ breast cancer is predominately diagnosed in women. Approximately 1% of all breast cancers are diagnosed in men. <sup>a,b</sup>                                                                                                                               |
| Age                                                 | Median age at diagnosis of HR+, HER2+ breast cancer amongst females from 2016-2020 was 58 years (across all races/ethnicities). <sup>c</sup>                                                                                                                            |
| Race/Ethnicity                                      | SEER 5-Year Age-Adjusted Incidence Rates (2016-2020) for HR+, HER2+ breast cancer per 100,000 were 12.6 for all races/ethnicities, 12.8 for black (including Hispanic), 12.5 for white (including Hispanic) and 10.5 for Hispanic (any race). <sup>c</sup>              |
| Geography                                           | In 2020, the highest incidence rates of breast cancer were observed in Australia/New Zealand, Western Europe, Northern America and Northern Europe, while lower rates were observed in Central America, Eastern and Middle Africa, and South Central Asia. <sup>d</sup> |
| Other considerations                                | Breast cancer is the most frequently diagnosed cancer in females globally, with the HR+, HER2+ subtype making up an estimated 10% of all breast cancer subtypes in the US. <sup>e,f</sup>                                                                               |
| Overall Representativeness of this study            | The median age in this study was 55, 54, and 57 years for Arms A, B, and C, respectively. <sup>g</sup> This study also modeled a global approach with patients                                                                                                          |

|  |                                                                                                                                                                                                                                                                                                                                                             |
|--|-------------------------------------------------------------------------------------------------------------------------------------------------------------------------------------------------------------------------------------------------------------------------------------------------------------------------------------------------------------|
|  | <p>enrolled in Europe, North America, Asia Pacific, and South America.<sup>§</sup> Of the ITT population (237 patients), 163 were Caucasian, 35 were Asian, 9 were Black or African American, 2 were American Indian or Alaska Native, 1 was multiple, and 27 were missing/not reported.<sup>§</sup> Male participants were not eligible for the study.</p> |
|--|-------------------------------------------------------------------------------------------------------------------------------------------------------------------------------------------------------------------------------------------------------------------------------------------------------------------------------------------------------------|

<sup>a</sup> Gucalp A, Traina TA, Eisner JR, Parker JS, Selitsky SR, Park BH, *et al.* Male breast cancer: a disease distinct from female breast cancer. *Breast Cancer Research and Treatment* **2019**;173(1):37-48.

<sup>b</sup> Giordano SH. Breast cancer in men. *N Engl J Med* **2018**;378(24):2311-20.

<sup>c</sup> SEER\*Explorer: An interactive website for SEER cancer statistics [Internet]. Surveillance Research Program, National Cancer Institute; 2023 Apr 19. [updated: 2023 Jun 8; cited 2023 Aug 1]. Available from: <https://seer.cancer.gov/statistics-network/explorer/>. Data source(s): SEER Incidence Data, November 2022 Submission (1975-2020), [SEER 22 registries](#).

<sup>d</sup> Sung H, Ferlay J, Siegel RL, Laversanne M, Soerjomataram I, Jemal A, *et al.* Global cancer statistics 2020: GLOBOCAN estimates of incidence and mortality worldwide for 36 cancers in 185 countries. *CA Cancer J Clin* **2021**;71(3):209-49.

<sup>e</sup> Winters S, Martin C, Murphy D, Shokar NK. Breast cancer epidemiology, prevention, and screening. *Prog Mol Biol Transl Sci* **2017**;151:1-32.

<sup>f</sup> Howlader N, Altekruse SF, Li CI, Chen VW, Clarke CA, Ries LA, *et al.* US incidence of breast cancer subtypes defined by joint hormone receptor and HER2 status. *J Natl Cancer Inst* **2014**;106(5)

<sup>§</sup> Tolaney SM, Wardley AM, Zambelli S, Hilton JF, Troso-Sandoval TA, Ricci F, *et al.* Abemaciclib plus trastuzumab with or without fulvestrant versus trastuzumab plus standard-of-care chemotherapy in women with hormone receptor-positive, HER2-positive advanced breast cancer (monarchHER): a randomised, open-label, phase 2 trial. *Lancet Oncol* **2020**;21(6):763-75.
